# Supplementary material for: ACW-02 an Acridine Triazolidine Derivative Presents Antileishmanial Activity Mediated by DNA Interaction and Immunomodulation
Source: MDPI journal article supplement (doi:10.3390/ph16020204), 2023-01-29
Supplement: s1 [file s1]

## Experimental Section 1 (Structural Characterization)

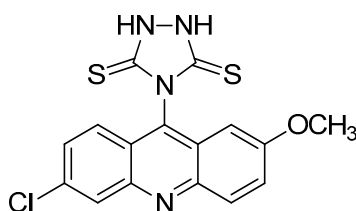

### 4-(6-chloro-2-methoxyacridin-9-yl)-1,2,4-triazolidine-3,5-dithione (ACW-02)

Orange crystals. Formula:  $C_{16}H_{11}ClN_4OS_2$ ; M.W.:  $374.8610 \text{ g mol}^{-1}$ ; Yield: 50%; Melting point: 282-284 °C; *R<sub>f</sub>*: 0.50 (*n*-hexane/EtOAc 7:3).  $^1\text{H}$  NMR (500 MHz, DMSO-*d*<sub>6</sub>):  $\delta$  3.88 (3H, *s*, OCH<sub>3</sub>); 7.36 (1H, *dd*, *J* = 2.05 Hz; *J* = 9.05 Hz, H-12); 7.52 (1H, *dd*, *J* = 2.9 Hz; *J* = 9.05 Hz, H-01); 7.62 (1H, *d*, *J* = 9.1 Hz, H-06); 7.65 (1H, *d*, *J* = 2 Hz, H-14); 8.25 (1H, *d*, *J* = 2.9 Hz, H-03); 8.83 (1H, *d*, *J* = 2.9 Hz, H-11); 12.79 (2H, *s*, NH).  $^{13}\text{C}$  NMR (100 MHz, DMSO-*d*<sub>6</sub>):  $\delta$  194.6459 (C-19, C-16); 156.3423 (C-13); 138.5071 (C-4); 136.2716 (C-8); 132.4865 (C-3); 131.3356 (C-2); 130.4602 (C-5); 127.5769 (C-9); 126.3238 (C-6); 126.9683 (C-12); 120.9024 (C-1); 117.8267 (C-11); 108.4340 (C-14); 55.8649 (OCH<sub>3</sub>). IR (KBr,  $\text{cm}^{-1}$ ): 3242-3147 (N-H); 3085-3056 (C-H<sub>Ar</sub>); 1621-1482 (C=C<sub>Ar</sub>); 1482 (N-C=S); 1208 (C=S); 1197 (C=C-O). MALDI-TOF MS *m/z*  $[\text{M}+\text{H}]^+$ : calculated = 374.0063; found = 375.0096.

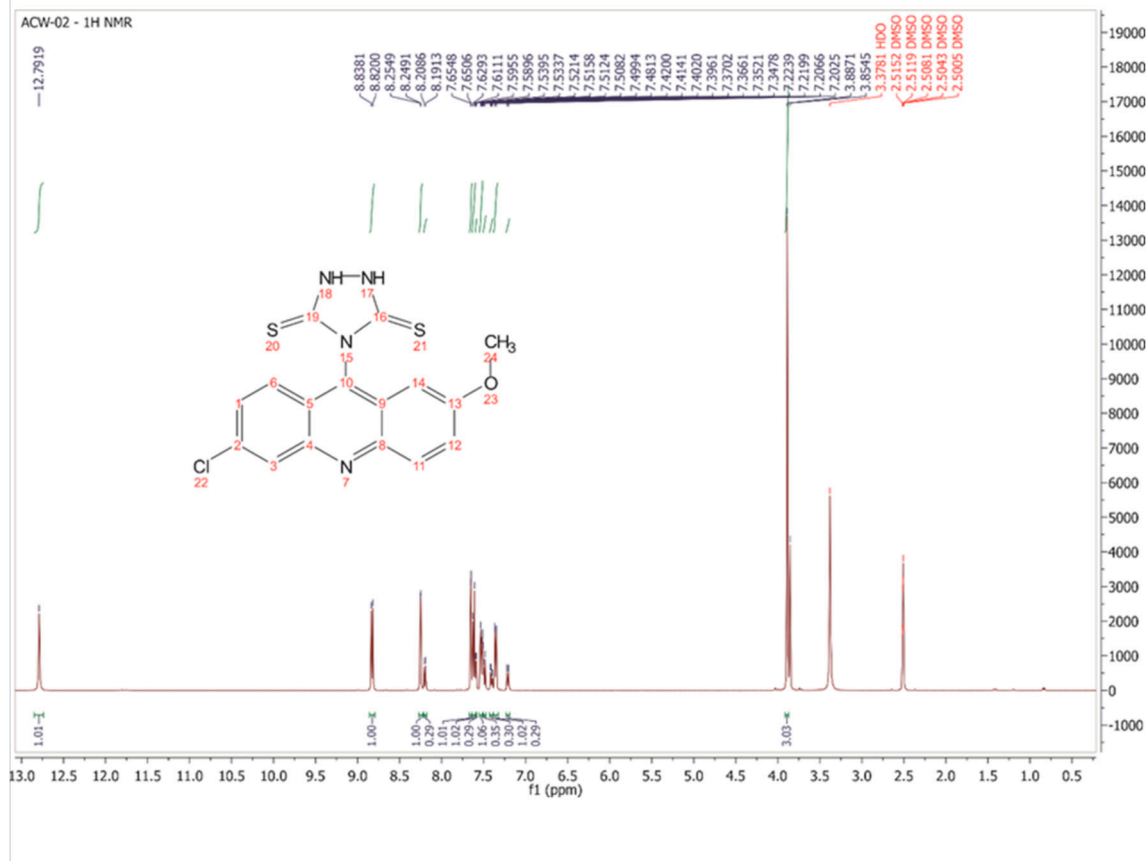

**Figure S1.**  $^1\text{H}$  NMR spectrum of ACW-02 (500 MHz, DMSO- $d_6$ )

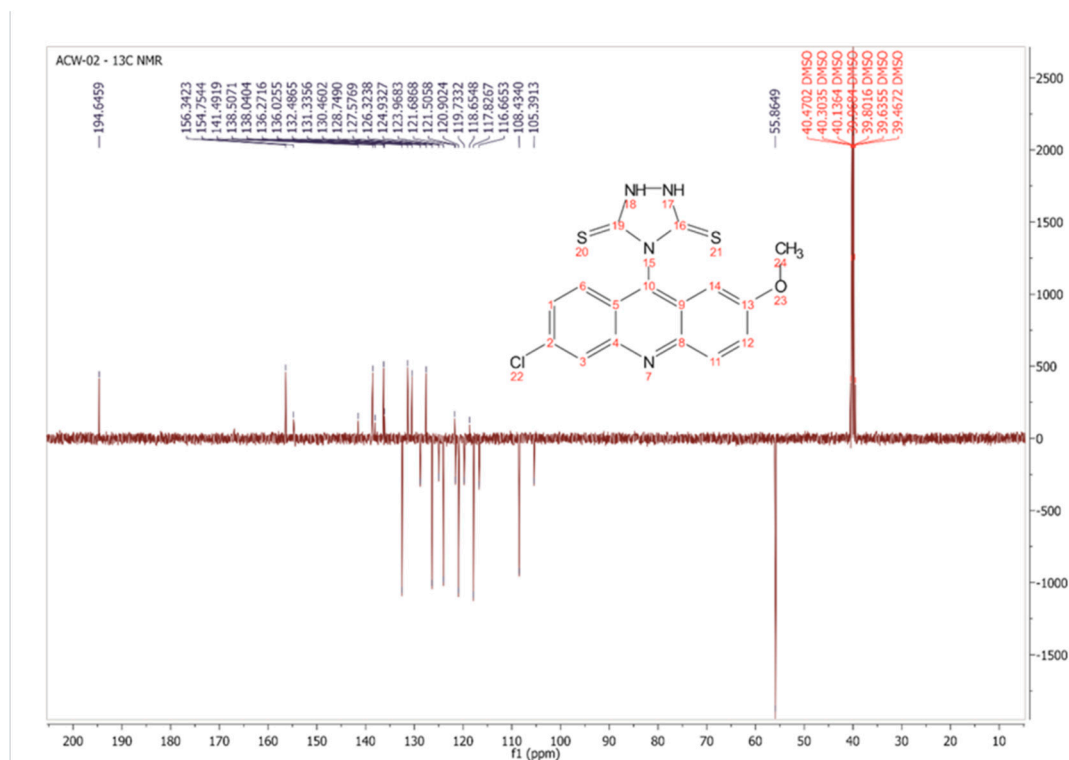

**Figure S2.**  $^{13}\text{C}$  NMR spectrum of ACW-02 (125 MHz, DMSO- $d_6$ )

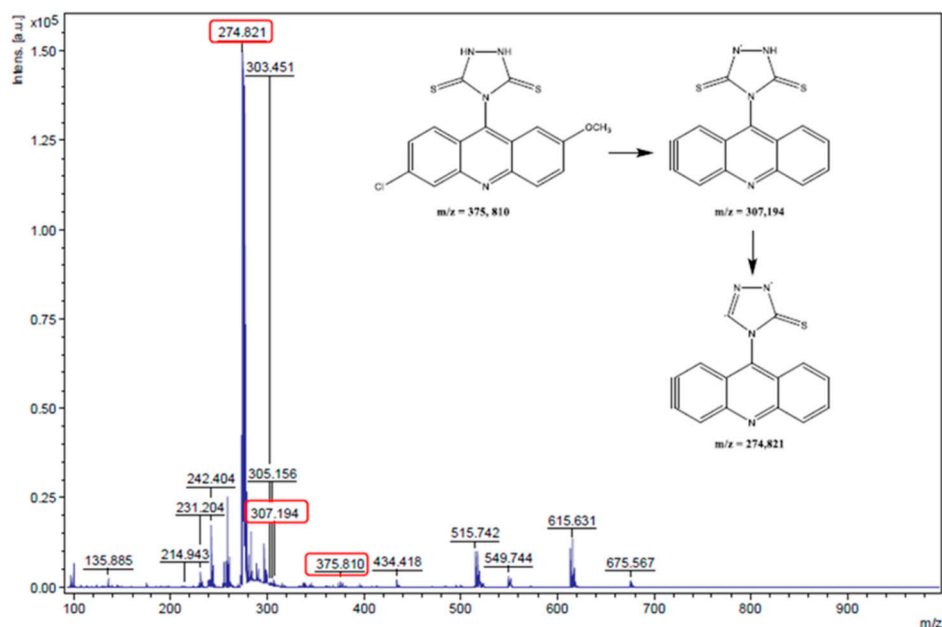

**Figure S3.** Extended Mass spectrum of ACW-02 by MALDI-TOF

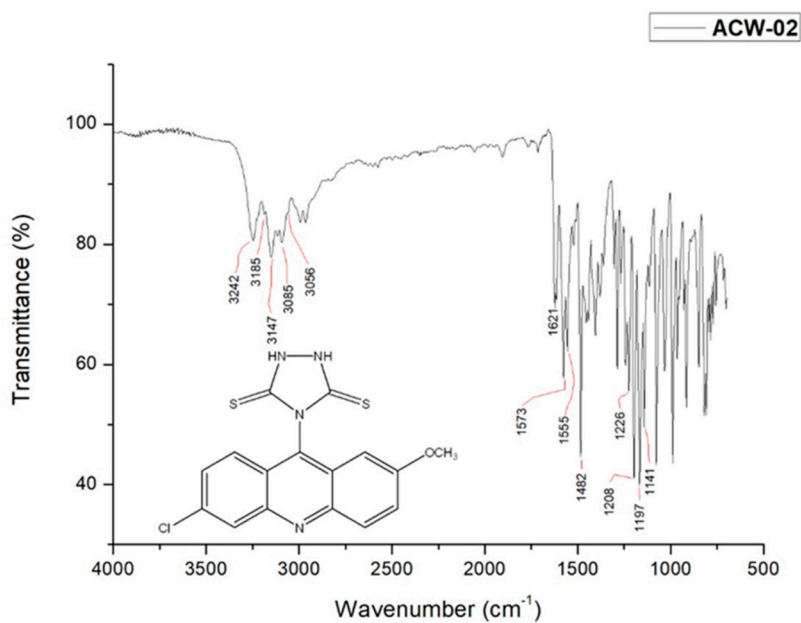

**Figure S4.** Infrared (IR) of ACW-02

## Experimental Section 2 (*In vitro* studies)

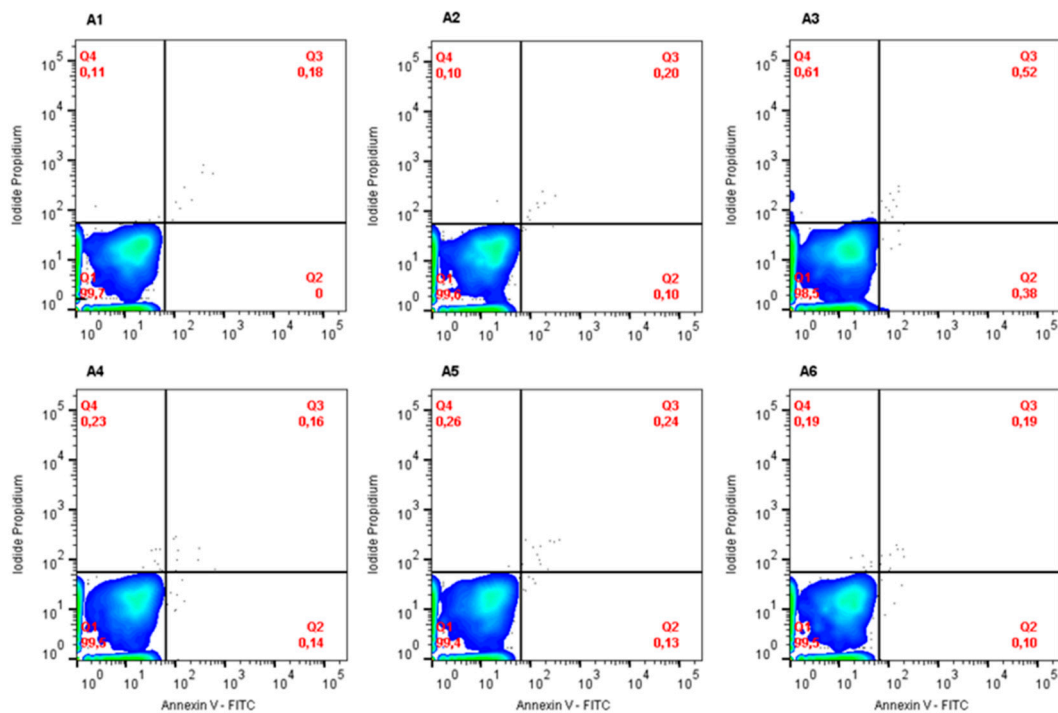

**Figure S5.** Annexin V-FITC/PI assay with control group

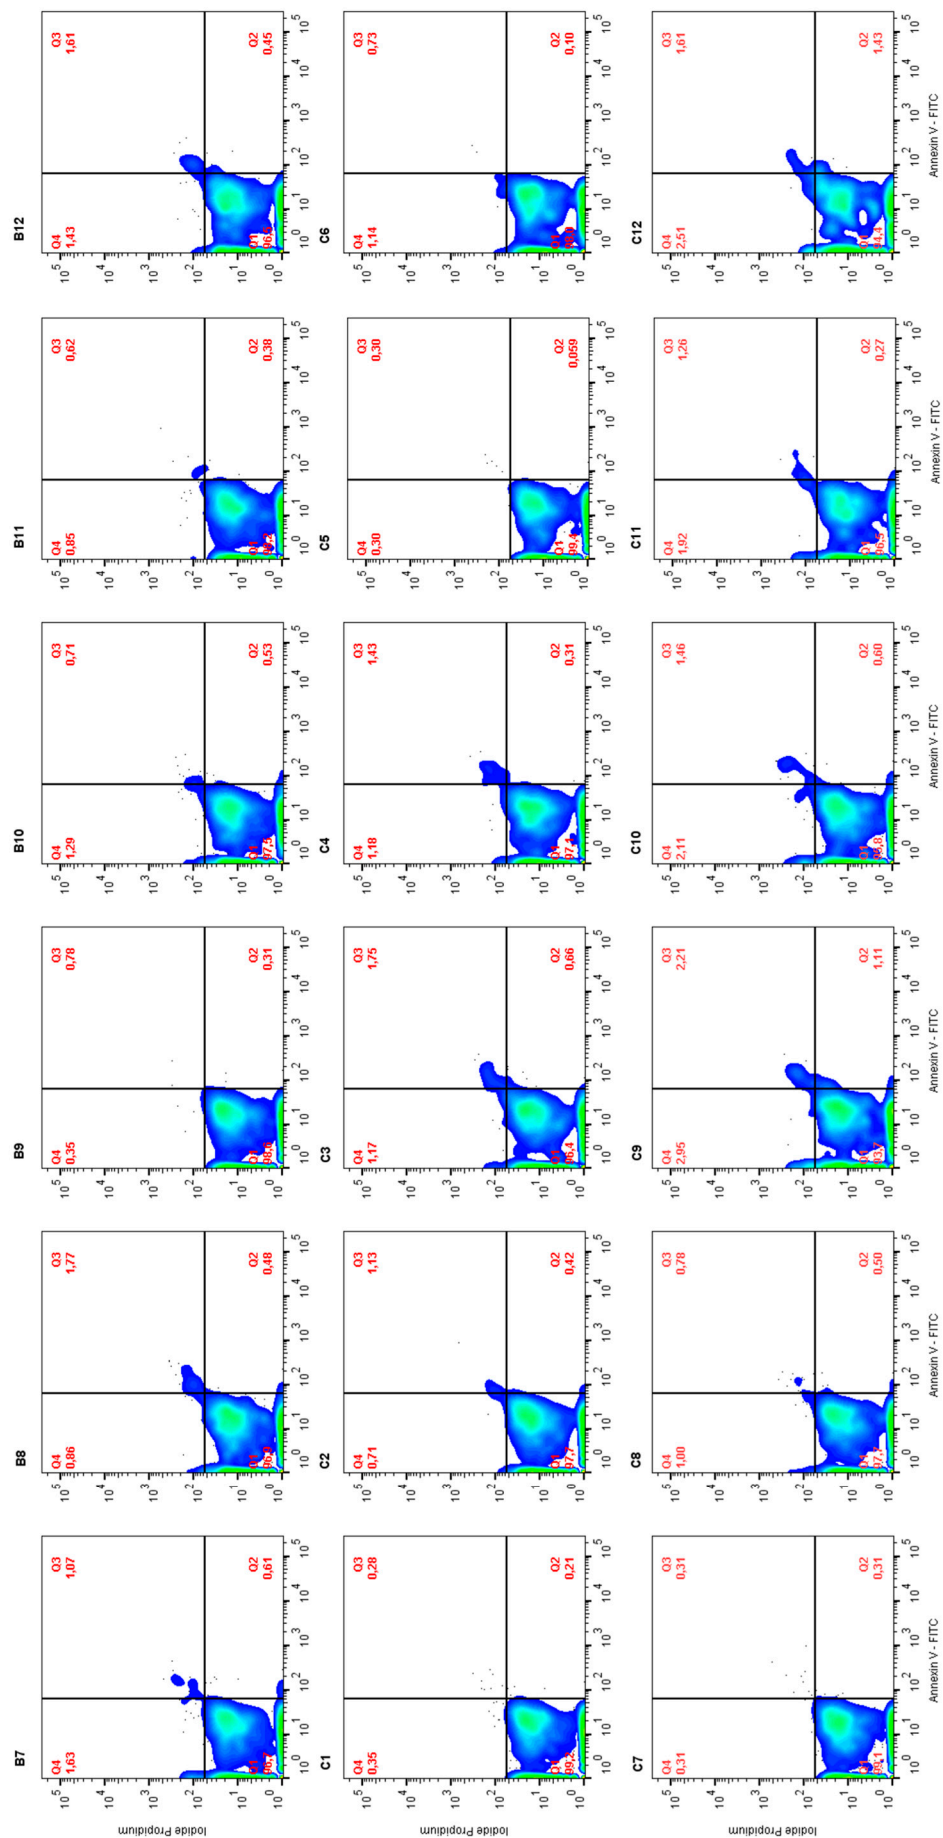

**Figure S6.** Effect of compound ACW-02 on macrophages. B7-B12 – 1  $\mu\text{g mL}^{-1}$ . C1-C6 – 16  $\mu\text{g mL}^{-1}$ . C7-C12 – 32  $\mu\text{g mL}^{-1}$ .

**Table S1.** Descriptive statistics of ACW-02 *in vitro* experiments.

| <b>Experiment</b>                 | <b>Concentration/condition evaluated (<math>\mu\text{g mL}^{-1}</math>)</b> | <b>Mean</b> | <b>Standard error of mean (<math>\pm</math>)</b> |
|-----------------------------------|-----------------------------------------------------------------------------|-------------|--------------------------------------------------|
| Cytotoxicity in macrophages (3.3) | 0 – Early Apoptosis                                                         | 0,05667     | 0,02603                                          |
| Cytotoxicity in macrophages (3.3) | 0 – Later Apoptosis                                                         | 0,1667      | 0,08950                                          |
| Cytotoxicity in macrophages (3.3) | 0 – Necrosis                                                                | 0,3067      | 0,008819                                         |
| Cytotoxicity in macrophages (3.3) | 1 – Early Apoptosis                                                         | 0,4600      | 0,04351                                          |
| Cytotoxicity in macrophages (3.3) | 1 – Later Apoptosis                                                         | 1,093       | 0,1995                                           |
| Cytotoxicity in macrophages (3.3) | 1 – Necrosis                                                                | 1,068       | 0,1917                                           |
| Cytotoxicity in macrophages (3.3) | 16 – Early Apoptosis                                                        | 0,2933      | 0,09120                                          |
| Cytotoxicity in macrophages (3.3) | 16 – Later Apoptosis                                                        | 0,9367      | 0,2464                                           |
| Cytotoxicity in macrophages (3.3) | 16 – Necrosis                                                               | 0,8083      | 0,1690                                           |
| Cytotoxicity in macrophages (3.3) | 32 – Early Apoptosis                                                        | 0,7033      | 0,1904                                           |
| Cytotoxicity in macrophages (3.3) | 32 – Later Apoptosis                                                        | 1,272       | 0,2706                                           |
| Cytotoxicity in macrophages (3.3) | 32 – Necrosis                                                               | 1,800       | 0,3999                                           |
| Cytokine production (3.5)         | Basal - TNF                                                                 | 126,2       | 0,3926                                           |
| Cytokine production (3.5)         | Leish- TNF                                                                  | 91,51       | 2,934                                            |
| Cytokine production (3.5)         | 2- TNF                                                                      | 23,07       | 1,457                                            |
| Cytokine production (3.5)         | 4- TNF                                                                      | 20,91       | 0,2558                                           |
| Cytokine production (3.5)         | 8- TNF                                                                      | 21,90       | 0,9601                                           |
| Cytokine production (3.5)         | Basal – INF                                                                 | 6,170       | 0,01155                                          |
| Cytokine production (3.5)         | Leish – INF                                                                 | 5,723       | 0,07623                                          |
| Cytokine production (3.5)         | 2 – INF                                                                     | 5,113       | 0,09838                                          |
| Cytokine production (3.5)         | 4– INF                                                                      | 4,947       | 0,2050                                           |
| Cytokine production (3.5)         | 8– INF                                                                      | 5,313       | 0,2410                                           |
| Cytokine production (3.5)         | Basal – IL-2                                                                | 7,583       | 0,01453                                          |
| Cytokine production (3.5)         | Leish – IL-2                                                                | 7,193       | 0,02333                                          |
| Cytokine production (3.5)         | 2 – IL-2                                                                    | 7,300       | 0,06658                                          |
| Cytokine production (3.5)         | 4 – IL-2                                                                    | 7,080       | 0,3011                                           |
| Cytokine production (3.5)         | 8 – IL-2                                                                    | 7,220       | 0,07572                                          |
| Cytokine production (3.5)         | Basal – IL-10                                                               | 2,533       | 0,2794                                           |
| Cytokine production (3.5)         | Leish– IL-10                                                                | 5,163       | 0,2245                                           |
| Cytokine production (3.5)         | 2– IL-10                                                                    | 1,797       | 0,9308                                           |

|                                            |               |       |         |
|--------------------------------------------|---------------|-------|---------|
| Cytokine production (3.5)                  | 4– IL-10      | 1,500 | 0,4864  |
| Cytokine production (3.5)                  | 8– IL-10      | 1,213 | 0,6271  |
| Cytokine production (3.5)                  | Basal – IL-4  | 7,220 | 0,4013  |
| Cytokine production (3.5)                  | Leish– IL-4   | 7,347 | 0,1367  |
| Cytokine production (3.5)                  | 2– IL-4       | 7,140 | 0,1480  |
| Cytokine production (3.5)                  | 4– IL-4       | 6,457 | 0,1729  |
| Cytokine production (3.5)                  | 8– IL-4       | 6,773 | 0,1224  |
| Cytokine production (3.5)                  | Basal– IL-6   | 7,770 | 0,06928 |
| Cytokine production (3.5)                  | Leish– IL-6   | 7,490 | 0,02309 |
| Cytokine production (3.5)                  | 2– IL-6       | 5,753 | 0,2348  |
| Cytokine production (3.5)                  | 4– IL-6       | 6,230 | 0,1604  |
| Cytokine production (3.5)                  | 8– IL-6       | 5,840 | 0,1539  |
| Cytokine production (3.5)                  | Basal– IL-17A | 5,950 | 0,02887 |
| Cytokine production (3.5)                  | Leish– IL-17A | 6,413 | 0,02333 |
| Cytokine production (3.5)                  | 2– IL-17A     | 5,867 | 0,1970  |
| Cytokine production (3.5)                  | 4– IL-17A     | 5,720 | 0,1856  |
| Cytokine production (3.5)                  | 8– IL-17A     | 5,780 | 0,2892  |
| Reactive oxygen and nitrogen species (3.6) | Basal – ROS   | 3852  | 318,6   |
| Reactive oxygen and nitrogen species (3.6) | Leish– ROS    | 7933  | 442,5   |
| Reactive oxygen and nitrogen species (3.6) | 2– ROS        | 8006  | 77,83   |
| Reactive oxygen and nitrogen species (3.6) | 4– ROS        | 7293  | 225,0   |
| Reactive oxygen and nitrogen species (3.6) | 8– ROS        | 7658  | 133,7   |
| Reactive oxygen and nitrogen species (3.6) | Basal– RNS    | 1193  | 26,27   |
| Reactive oxygen and nitrogen species (3.6) | Leish– RNS    | 1055  | 64,67   |
| Reactive oxygen and nitrogen species (3.6) | 2– RNS        | 1087  | 4,041   |
| Reactive oxygen and nitrogen species (3.6) | 4– RNS        | 1047  | 46,61   |
| Reactive oxygen and nitrogen species (3.6) | 8– RNS        | 1016  | 14,18   |

### Experimental Section 3 (*In silico* studies)

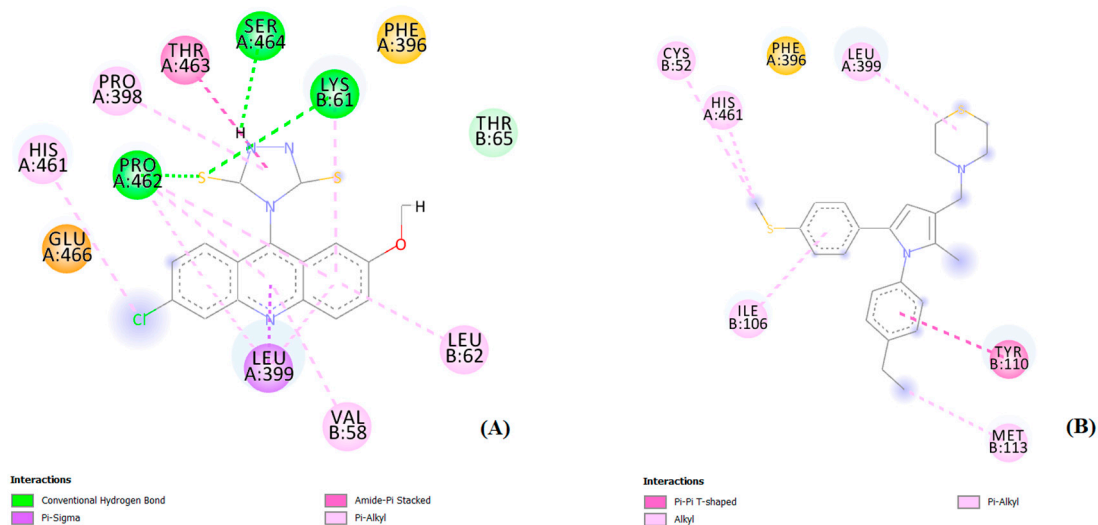

**Figure S7.** Molecular docking of ACW-02 (A) on trypanothione reductase from *L. infantum* (PDB ID: 4APN). A direct docking comparison was performed with a diarylpyrrole derivative (B), complexed in the crystallographic model used; this one has competitive mode inhibition reported to the TryR site. Types of interactions with the biological receptor are highlighted above for the respective compounds studied.

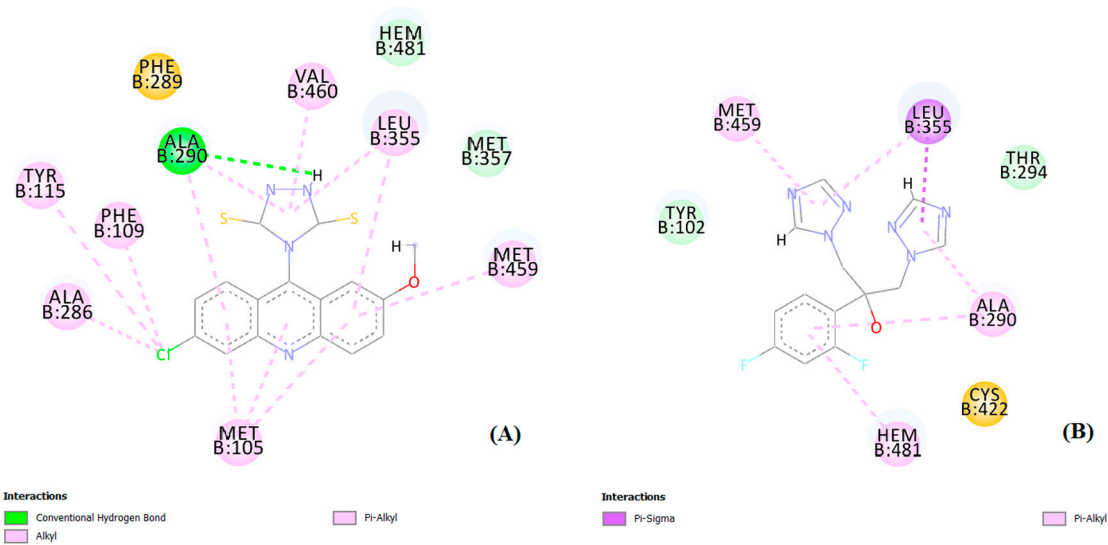

**Figure S8.** Molecular docking of ACW-02 (A) on sterol 14- $\alpha$  demethylase (CYP51) from *L. infantum* (PDB ID: 3L4D). A direct comparison of docking was performed with a known catalytic inhibitor of CYP51, fluconazole (B). Types of interactions with the biological receptor are highlighted above for the respective compounds studied.



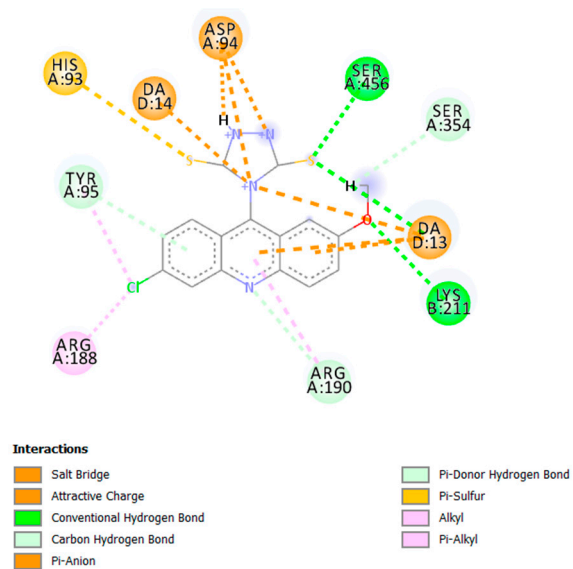

**Figure S9.** Molecular docking of ACW-02 on topoisomerase 1 (TOP I) from *L. donovani* (PDB ID: 2B9S).

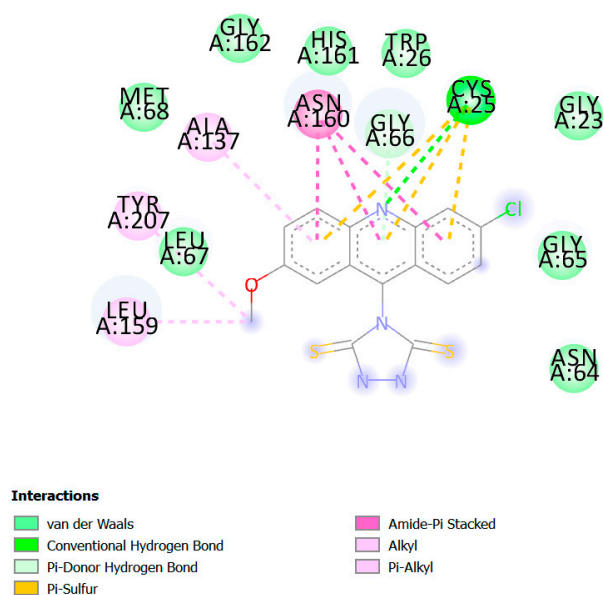

**Figure S10.** Molecular docking of ACW-02 on cysteine protease B from *L. amazonensis* (CPBLA).
